# Supplementary material
Source: Springer Nature journal article supplement (https://www.springermedizin.de/resource/supplementary/12885_2011_2767_MOESM12_ESM.pdf/9461894)

**Normalized and Shifted Melting Curves**

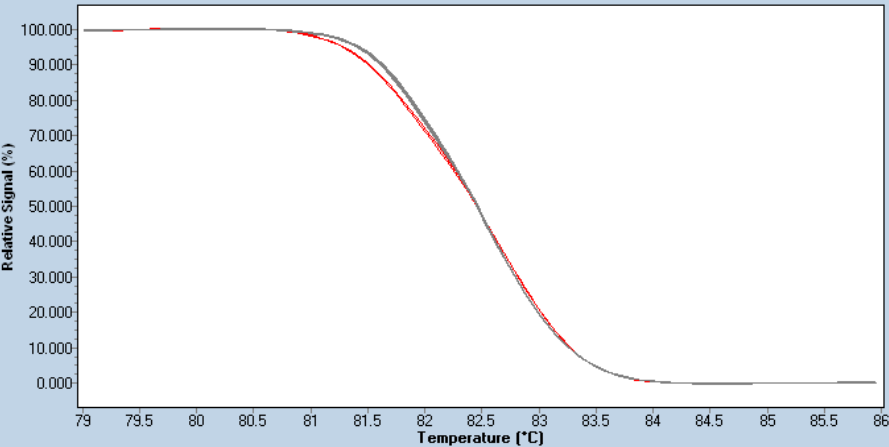

**Normalized and Temp-Shifted Difference Plot**

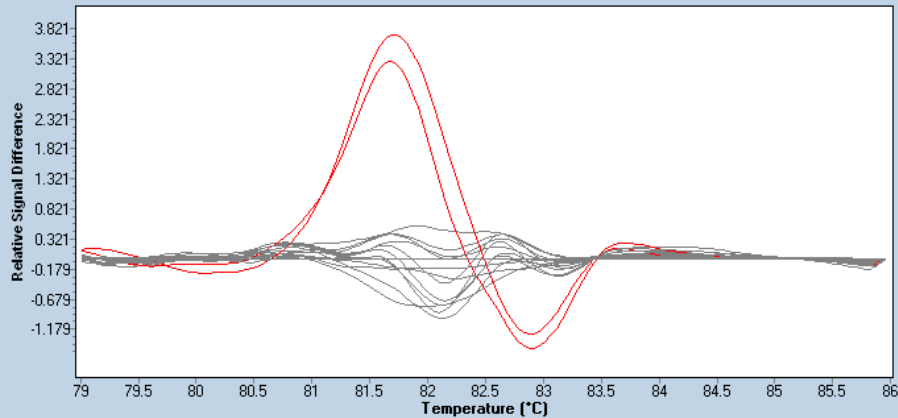

Supplement: MOESM12 [file 9461894]
